# Supplementary material
Source: publisher site journal article supplement (https://neobiota.pensoft.net/article/71868/download/suppl/32/)
Supplement: Supplementary file 1

## Ecological and potential socioeconomic impacts of two globally invasive crayfish

Takudzwa C. Madzivanzira<sup>1,2,\*</sup>, Olaf L.F. Weyl<sup>2,3,1</sup> and Josie South<sup>4,3,2,1</sup>

<sup>1</sup> Department of Ichthyology and Fisheries Science, Rhodes University, Makhanda 6140, South Africa

<sup>2</sup> DSI/NRF Research Chair in Inland Fisheries and Freshwater Ecology, South African Institute for Aquatic Biodiversity (SAIAB), Makhanda 6140, South Africa

<sup>3</sup> Centre for Invasion Biology, SAIAB, Makhanda, 6140 South Africa

<sup>4</sup> School of Biology, Faculty of Biological Sciences, University of Leeds, Leeds LS2 9JT, UK

### Supplementary Information 2

#### Field and laboratory photos showing crayfish damage

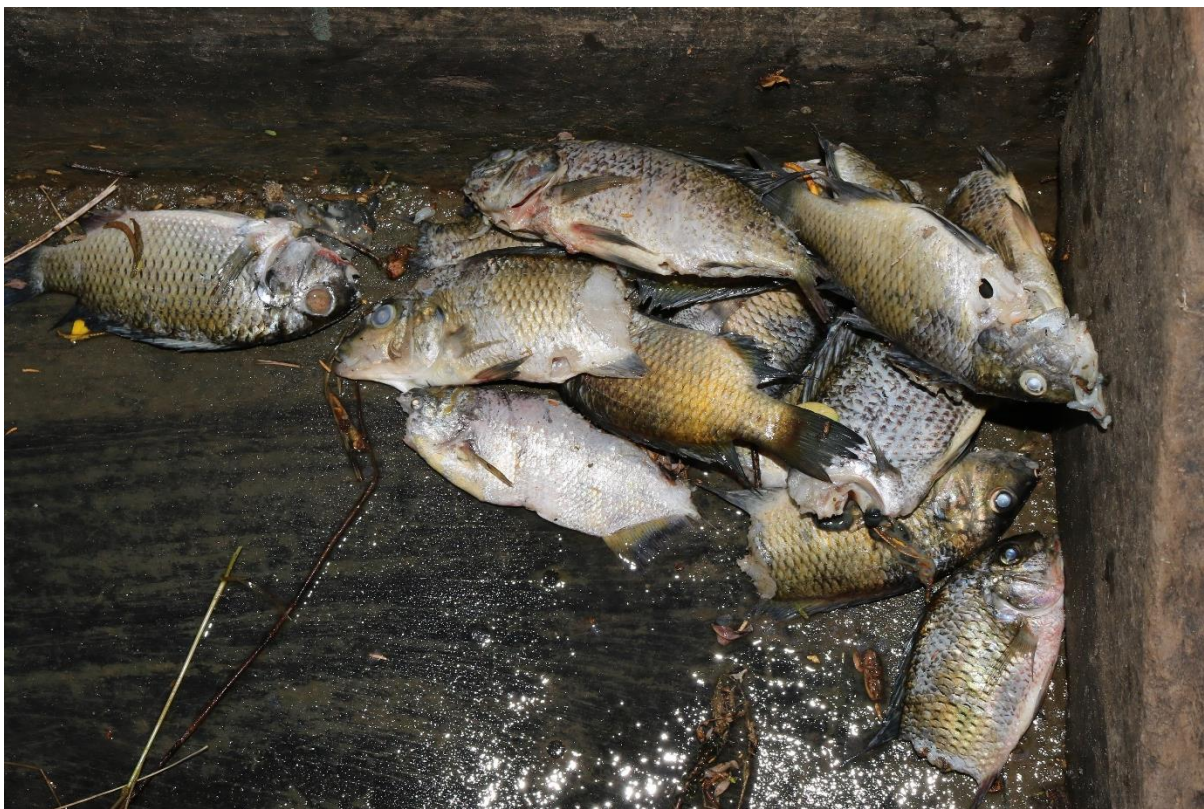

Supplementary Plate 2(a). Catch (*Tilapia* sp.) spoilage by *C. quadricarinatus* in Kafue River, Zambia, 2018. Photograph BR Ellender (WWF Zambia).

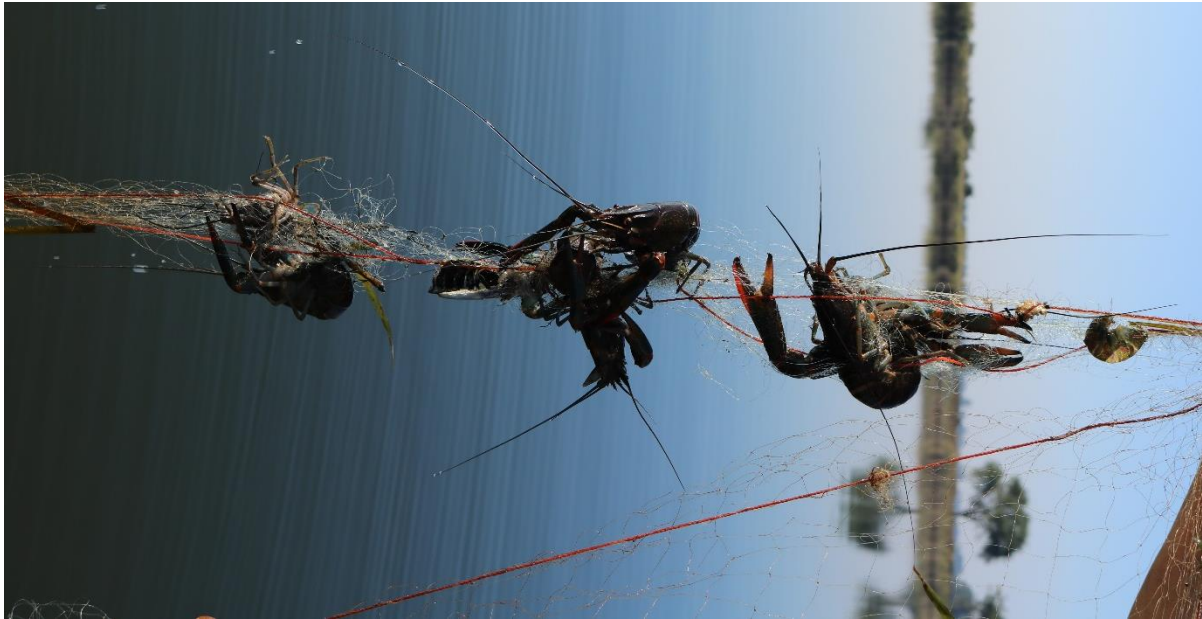

Supplementary Plate 2(b). Abandoned damaged net from the Barotse floodplain Zambia, 2018 with entangled *C. quadricarinatus*. Photograph BR Ellender (WWF Zambia).

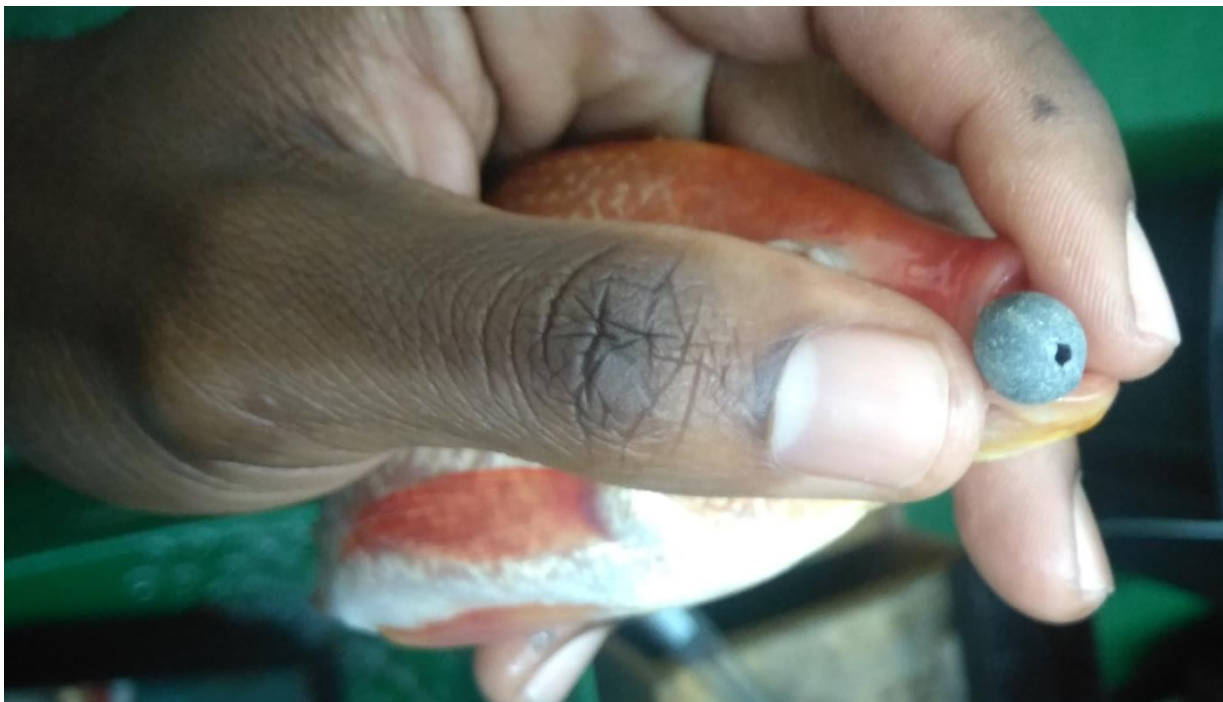

Supplementary Plate 2(c). A 50 g sinker being inserted in the guts of dead *Oreochromis mossambicus* for the scavenging experiments. Photo: TC Madzivanzira taken from SAIAB biosecure controlled environment laboratory, 2019.

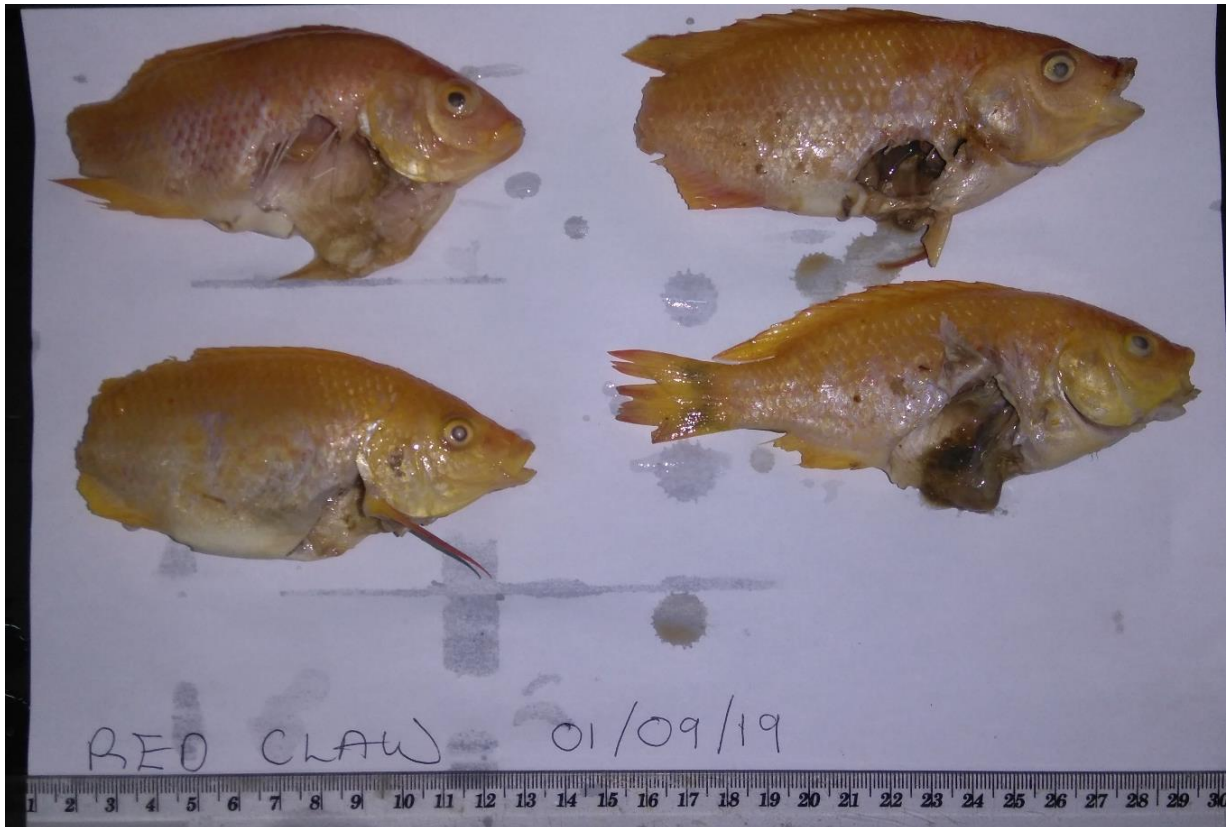

Supplementary Plate 2(d). Experimental catch (*Oreochromis mossambicus*) spoilage by *Cherax quadricarinatus*. Photo: TC Madzivanzira taken from SAIAB biosecure controlled environment laboratory, 2019.

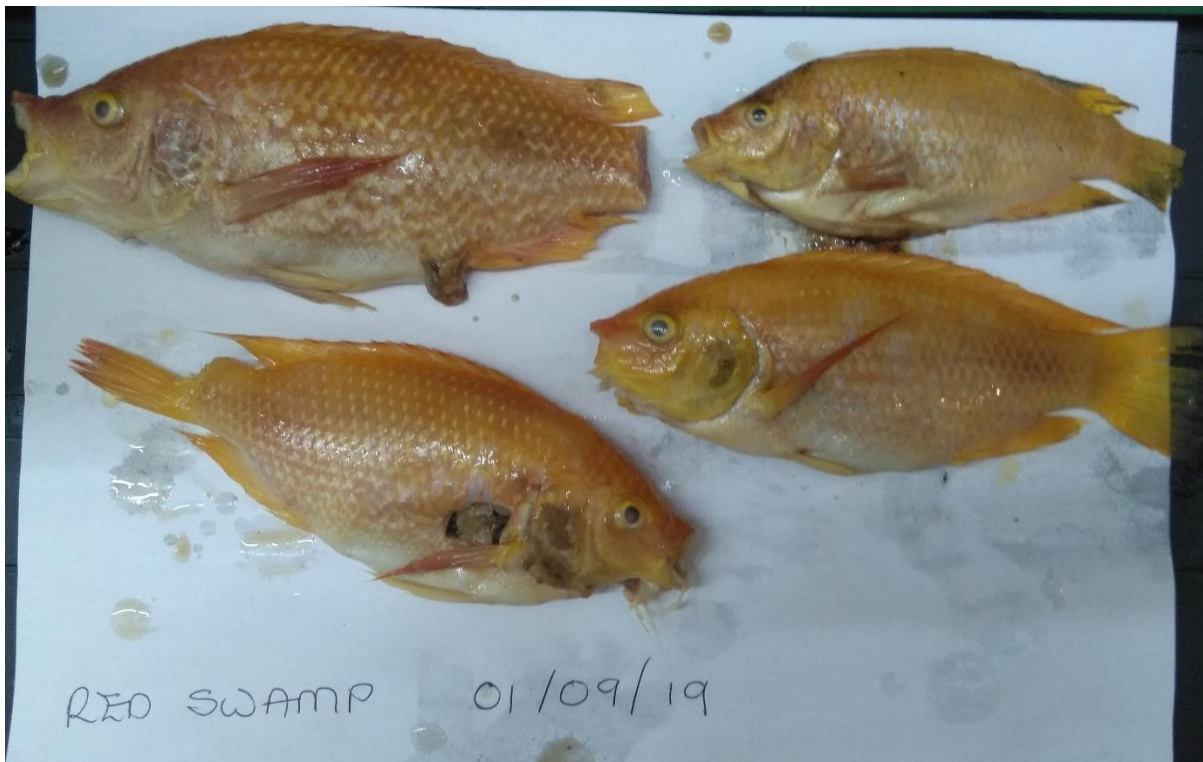

Supplementary Plate 2(e). Experimental catch (*Oreochromis mossambicus*) spoilage by *Procambarus clarkii*. Photo: TC Madzivanzira taken from SAIAB biosecure controlled environment laboratory, 2019.

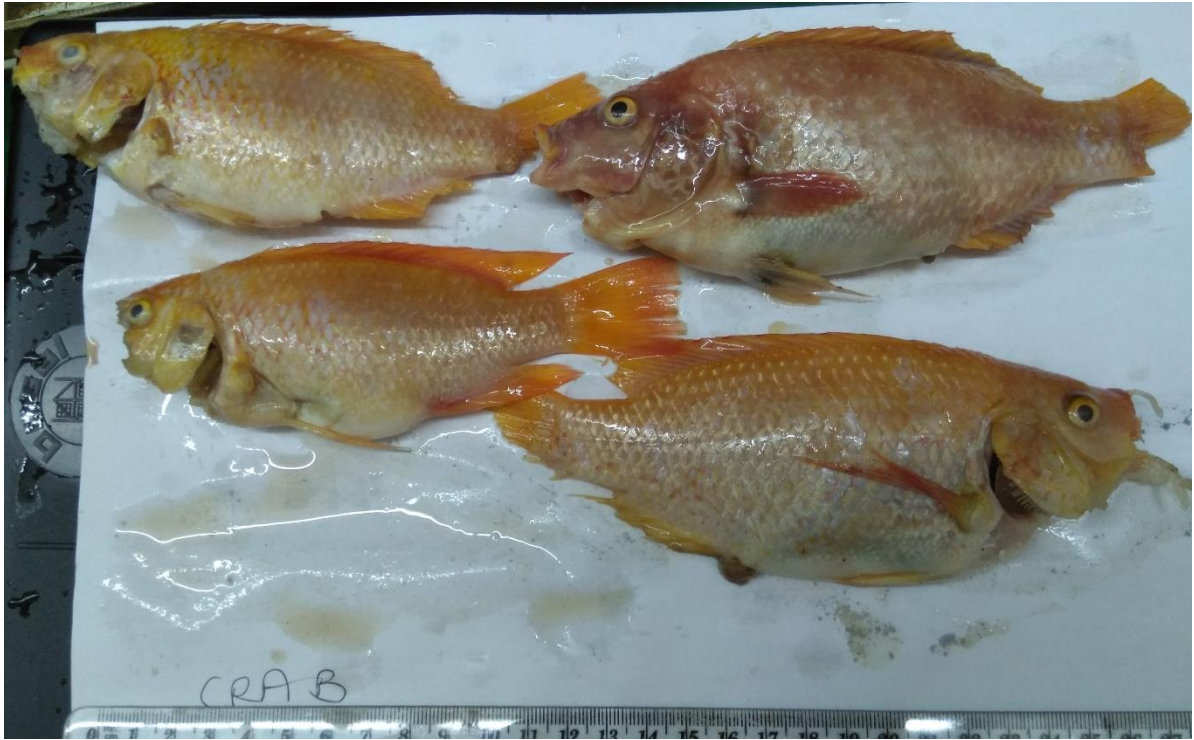

Supplementary Plate 2(f). Experimental catch (*Oreochromis mossambicus*) spoilage by *Potamounates perlatus*. Photo: TC Madzivanzira taken from SAIAB biosecure controlled environment laboratory, 2019).
